# Supplementary material
Source: publisher site journal article supplement (https://www.dovepress.com/article/407802)
Supplement: Supplementary file 1 [file get_supplementary_file.php]

Appendices

Appendix I: Search strategy

| Search | Query |
| --- | --- |
| #1 Concept | Reablement OR re-ablement OR “restorative care” OR “restorative rehabilitation” OR “reactivation care” OR “everyday rehabilitation” |
| #2 Concept | Hverdagsrehabilitering OR vardagsrehabilitering |
| #3 | #1 OR #2 |

Appendix II: Adapted search strategy (Medline)

| Search | Query |
| --- | --- |
| #1 | (Reablement).ti,ab,kw |
| #2 | (Re-ablement).ti,ab,kw |
| #3 | ("Restorative care").ti,ab,kw |
| #4 | ("Restorative rehabilitation").ti,ab,kw |
| #5 | ("Reactivation care").ti,ab,kw |
| #6 | ("Everyday rehabilitation").ti,ab,kw |
| #7 | (Hverdagsrehabilitering).ti,ab,kw |
| #8 | (Vardagsrehabilitering).ti,ab,kw |
| #9 | #1 OR #2 OR #3 OR #4 OR #5 OR #6 OR #7 OR #8 |
| Start of Index to  28 February 2022 | 604 |
| 2022 to 31 August 2022 | 44 |

Appendix III: Summary of the PRISMA 2020 check list item

| **SECTION** | **ITEM** | **PRISMA-ScR CHECKLIST ITEM** | **REPORTED ON PAGE #** |
| --- | --- | --- | --- |
| **TITLE** | | | |
| Title | 1 | Identify the report as a scoping review. | 1 |
| **ABSTRACT** | | | |
| Structured summary | 2 | Provide a structured summary that includes (as applicable): background, objectives, eligibility criteria, sources of evidence, charting methods, results, and conclusions that relate to the review questions and objectives. | 1 |
| **INTRODUCTION** | | | |
| Rationale | 3 | Describe the rationale for the review in the context of what is already known. Explain why the review questions/objectives lend themselves to a scoping review approach. | 1-2 |
| Objectives | 4 | Provide an explicit statement of the questions and objectives being addressed with reference to their key elements (eg, population or participants, concepts, and context) or other relevant key elements used to conceptualize the review questions and/or objectives. | 2 |
| **METHODS** | | | |
| Protocol and registration | 5 | Indicate whether a review protocol exists; state if and where it can be accessed (e.g., a Web address); and if available, provide registration information, including the registration number. | 2 |
| Eligibility criteria | 6 | Specify characteristics of the sources of evidence used as eligibility criteria (e.g., years considered, language, and publication status), and provide a rationale. | 2 |
| Information sources | 7 | Describe all information sources in the search (e.g., databases with dates of coverage and contact with authors to identify additional sources), as well as the date the most recent search was executed. | 3, Figure 1 |
| Search | 8 | Present the full electronic search strategy for at least 1 database, including any limits used, such that it could be repeated. | Appendix I-II |
| Selection of sources of evidence | 9 | State the process for selecting sources of evidence (i.e., screening and eligibility) included in the scoping review. | 3-4 |
| Data charting process | 10 | Describe the methods of charting data from the included sources of evidence (e.g., calibrated forms or forms that have been tested by the team before their use, and whether data charting was done independently or in duplicate) and any processes for obtaining and confirming data from investigators. | 4-5 |
| Data items | 11 | List and define all variables for which data were sought and any assumptions and simplifications made. | 3-5 |
| Critical appraisal of individual sources of evidence | 12 | If done, provide a rationale for conducting a critical appraisal of included sources of evidence; describe the methods used and how this information was used in any data synthesis (if appropriate). | Not conducted |
| Synthesis of results | 13 | Describe the methods of handling and summarizing the data that were charted. | 5 |
| **RESULTS** | | | |
| Selection of sources of evidence | 14 | Give numbers of sources of evidence screened, assessed for eligibility, and included in the review, with reasons for exclusions at each stage, ideally using a flow diagram. | 5, Figure 1 |
| Characteristics of sources of evidence | 15 | For each source of evidence, present characteristics for which data were charted and provide the citations. | 5-10, Table 1 |
| Critical appraisal within sources of evidence | 16 | If done, present data on critical appraisal of included sources of evidence (see item 12). | Not conducted |
| Results of individual sources of evidence | 17 | For each included source of evidence, present the relevant data that were charted that relate to the review questions and objectives. | 5-10 |
| Synthesis of results | 18 | Summarize and/or present the charting results as they relate to the review questions and objectives. | 5-10, Figures 2-6 |
| **DISCUSSION** | | | |
| Summary of evidence | 19 | Summarize the main results (including an overview of concepts, themes, and types of evidence available), link to the review questions and objectives, and consider the relevance to key groups. | 10-13 |
| Limitations | 20 | Discuss the limitations of the scoping review process. | 12-13 |
| Conclusions | 21 | Provide a general interpretation of the results with respect to the review questions and objectives, as well as potential implications and/or next steps. | 13 |
| **FUNDING** | | | |
| Funding | 22 | Describe sources of funding for the included sources of evidence, as well as sources of funding for the scoping review. Describe the role of the funders of the scoping review. | 13 |

JBI = Joanna Briggs Institute; PRISMA-ScR = Preferred Reporting Items for Systematic reviews and Meta-Analyses extension for Scoping Reviews.

Appendix IV: Included publications

Abrahamson K, Mueller C, Duan Y, Cooke V. Heightening Person-Centered Care Processes in the Delivery of Nursing Restorative Care. *J Gerontol Nurs*. 2019;45(5):5-10.doi: 10.3928/00989134-20190328-03

Adamson E, Cusack T, Casey M, Blake C. An evaluation of client satisfaction following a period of rehabilitation in the community reablement unit. *Ir J Med Sci*. 2012;181(SUPPL. 7):S237.

Ambugo EA, Dar I, Bikova MS, Førland O, Tjerbo T. A qualitative study on promoting reablement among older people living at home in Norway: opportunities and constraints. *BMC Health Serv Res.* 2022;22(1):150. Doi: 10.1186/s12913-022-07543-z

Ashe MC, Azim FT, Ariza-Vega P, Burns J, Clemson L, Grover S, et al. Determinants of implementing reablement into research or practice: A concept mapping study. *Physiother Res Int.* 2022;27(3):e1949. doi:10.1002/pri.1949.

Aspinal F, Glasby J, Rostgaard T, Tuntland H, Westendorp RCJ. New horizons: Reablement - supporting older people towards independence. *Age Ageing*. 2016;45(5):574-8. doi:10.1093/ageing/afw094.

Assander S, Bergstrom A, Eriksson C, Meijer S, Guidetti S. ASSIST: a reablement program for older adults in Sweden - a feasibility study. *BMC Geriatr*. 2022;22(1):618. doi:10.1186/s12877-022-03185-2.

Azim FT, Burton E, Ariza-Vega P. al. Exploring behavior change techniques for reablement: A scoping review. *Braz J Phys The*r. 2022;26(2):100401. doi: 10.1016/j.bjpt.2022.100401.

Baker DI, Gottschalk M, Eng C, Weber S, Tinetti ME. The design and implementation of a restorative care model for home care. *Gerontologist*. 2001;41(2):257-63. doi:10.1093/geront/41.2.257.

Baldelli MV, Boiardi R, Fabbo A, Pradelli JM, Neri M. The role of reality orientation therapy in restorative care of elderly patients with dementia plus stroke in the subacute nursing home setting. *Arch Gerontol Geriatr Supp*l. 2002; 8:15-22. doi:10.1016/s0167-4943(02)00098-5.

Bauer A, Fernandez J-L, Henderson C, Wittenberg R, Knapp M. Cost-minimisation analysis of home care reablement for older people in England: A modelling study. *Health Soc Care Community*. 2019;27(5):1241-50. doi:10.1111/hsc.12756.

Benjamin K, Edwards N, Ploeg J, Legault F. Barriers to physical activity and restorative care for residents in long-term care: a review of the literature. *J Aging Phys Act*. 2014;22(1):154-65. doi:10.1123/japa.2012-0139.

Beresford B, Mayhew E, Duarte A, Faria R, Weatherly H, Mann R, et al. Outcomes of reablement and their measurement: Findings from an evaluation of English reablement services. *Health Soc Care Community*. 2019;27(6):1438-50. doi: 10.1111/hsc.

Beresford B, Mann R, Parker G, Kanaan M, Faria R, Rabiee P, et al. Reablement services for people at risk of needing social care: the MoRe mixed-methods evaluation. 2019.*Health Serv Deliv Res.* 2019;7(16) doi: 10.3310/hsdr07160.

Bergström A, Borell L, Meijer S, Guidetti S. Evaluation of an intervention addressing a reablement programme for older, community-dwelling persons in Sweden (ASSIST 1.0): A protocol for a feasibility study. *BMJ Open*. 2019;9(7): e025870.

Bergström A, Vik K, Haak M, Metzelthin S, Graff L, Hjelle KM. The jigsaw puzzle of activities for mastering daily life; service recipients and professionals' perceptions of gains and changes attributed to reablement-A qualitative meta-synthesis. *Scand J Occup Ther.* 2022;1-12. doi:10.1080/11038128.2022.2081603.

Bersvendsen T, Jungeilges J, Abildsnes E. Empirical evaluation of home-based reablement: A review. *Nord J Health Econ*. 2021; 9(1):9-10. doi: 10.5617/njhe.7838

Birkeland A, Tuntland H, Forland O, Jakobsen F, Langeland E. Interdisciplinary collaboration in reablement-a qualitative study. *J Multidiscip Healthc.* 2017;10: 195-203. doi:10.2147/JMDH.S133417.

Birkeland AK, Langeland E, Tuntland H, Jacobsen FF, Førland O. Reablement – specialized or integrated? *Nordisk Tidsskrift for Helseforskning*. 2018;14(1):1-20.

Bliksvær T, Bertelsen TM, Fabritius MK, Hansen MB, Lunde BV, Waldahl RH. The Diffusion of Home-Based Reablement in Norwegian Municipalities. *J Healthc Leadersh*. 2021; 13:231-42. doi: 10.2147/JHL.S326663.

Bond RR, Mulvenna MD, Finlay DD, Martin S. Multi-faceted informatics system for digitising and streamlining the reablement care model. *J Biomed Inform.* 2015;56: 30-41. doi: 10.1016/j.jbi.2015.05.008.

Bramble M, Young S, Prior S, Maxwell H, Campbell S, Marlow A, et al. A scoping review exploring reablement models of training and client assessment for older people in primary health care. *Prim Health Care Res Dev*. 2022;23: e11. doi:10.1017/S1463423621000918.

Buma, LE, Vluggen, S, Zwakhalen, S, Kempen, GI, Metzelthin SF*.* Effects on clients' daily functioning and common features of reablement interventions: a systematic literature review.*Eur J Ageing*. 2022;19(4):903-929. doi: 10.1007/s10433-022-00693-3.

Burton E, Lewin G, Boldy D. Physical activity levels of older adults receiving a home care service. *J Aging Phys Act.* 2013;21(2):140-54. doi:10.1123/japa.21.2.140.

Burton E, Lewin G, Clemson L, Boldy D. Effectiveness of a lifestyle exercise program for older people receiving a restorative home care service: A pragmatic randomized controlled trial. *Clin Interv Aging*. 2013;8: 1591-601. doi:10.2147/CIA.S44614.

Burton E, Lewin G, Clemson L, Boldy D. Long-term Benefits of a Lifestyle Exercise Program for Older People Receiving a Restorative Home Care Service: A Pragmatic Randomized Controlled Trial. *Healthy aging clin. care elder.* 2014;6: 1-9. link.gale.com/apps/doc/A382150599/HRCA?u=anon~eae56f3&sid=googleScholar&xid=b2d9826b.

Burton E, Lewin G, Clemson L, Boldy D. Determining the Feasibility of a Lifestyle Activity Program for Inclusion in a Restorative Home Care Service: A Pilot Study. *Act Adapt Aging*. 2014;38(2):79-93.

Bødker MN. Potentiality made workable – exploring logics of care in reablement for older people. *Ageing Soc*. 2019;39(9):2018-41.

Bødker MN, Christensen U, Langstrup H. Home care as reablement or enabling arrangements? An exploration of the precarious dependencies in living with functional decline. *Sociol Health Illn.* 2019;41(7):1358-72.

Bødker MN, Langstrup H, Christensen U. What constitutes 'good care' and 'good carers'? The normative implications of introducing reablement in Danish home care. *Health Soc Care Community*. 2019;27(5): e871-e8. doi:10.1111/hsc.12815

Chiang Y-H, Hsu H-C, Chen C-L, Chen C-F, Chang-Lee S-N, Chen Y-M, et al. Evaluation of Reablement Home Care: Effects on Care Attendants, Care Recipients, and Family Caregivers. *Int J Environ Res Public Health*. 2020;17(23). doi:10.3390/ijerph17238784.

Chiu E-C, Chi F-C, Chen P-T. Investigation of the home-reablement program on rehabilitation outcomes for people with stroke: A pilot study. *Medicine (Baltimore)*. 2021;100(26):e26515. doi:10.1097/MD.0000000000026515.

Clemson L, Laver K, Rahja M, et al. Implementing a Reablement Intervention, "Care of People with Dementia in Their Environments (COPE)": A Hybrid Implementation-Effectiveness Study. *Gerontologist.* 2021;61(6):965-76. doi:10.1093/geront/gnaa105.

Clotworthy A, Kusumastuti S, Westendorp RGJ. Reablement through time and space: a scoping review of how the concept of 'reablement' for older people has been defined and operationalised. *BMC Geriatr*. 2021;21(1):61. doi:10.1186/s12877-020-01958-1.

Cochrane A, McGilloway S, Furlong M, Molloy DW, Stevenson M, Donnelly M. Home-care 're-ablement' services for maintaining and improving older adults' functional independence. *Cochrane Database of Syst Rev*. 2013;2013(11):CD010825.

Cochrane A, McGilloway S, Furlong M, Molloy DW, Stevenson M, Donnoly M. Time-limited home-care reablement for maintaining and improving the functional independence of older adults (Review). *Cochrane Database Syst Rev*. 2016;10: Art. No.:CD101825. doi: 10.1002/14651858.CD010825.pub2.

Crawford H, Anderson S, TeKamp R, Chatzikiriakos V, Osborne D. Enhanced activation and restorative care. *Healthc Manage Forum*.2012;25(1):4-9. doi:10.1016/j.hcmf.2011.12.002

Culph J, Clemson L, Jeon YH, Scanlan J, Laver K. Preparing for Implementation Within Therapy Services for People With Dementia: Exploring Expectations and Experiences Among Service Providers. *J Appl Gerontol.* 2021;40(10):1172-9. doi:10.1177/0733464820986286.

Culph J, Clemson L, Scanlan J, Craven L, Jeon YH, Laver K. Exploring relationships between health professionals through the implementation of a reablement program for people with dementia: A mixed methods study. *Brain Impairment.* 2020;21(3):286-98. doi: 10.1017/BrImp.2020.2

Der-Sheng H, Po-Wen C, En-Chi C, Han D-S, Chuang P-W, Chiu E-C. Effect of home-based reablement program on improving activities of daily living for patients with stroke: A pilot study. *Medicine (Baltimore)*. 2020;99(49):1-6. doi:10.1097/MD.0000000000023512.

Dibsdall L. Selecting from their toolbox of interventions – A realist study of the role of occupational therapists in reablement services. *Brit J Occup Ther*. 2022;85(7):513-522. doi:10.1177/03080226211054379

Doh D, Smith R, Gevers P. Reviewing the reablement approach to caring for older people. *Ageing & Society*. 2020;40(6):1371-83. doi: 10.1017/S0144686X18001770

Doughty K, Mulvihill P. Digital reablement – a personalised service to reduce admissions and readmissions to hospitals and nursing homes. *J Assist Technol*. 2013;7(4):228-34.

Edelstein B, Scandiffio J. Predictors of Functional Improvement, Length of Stay, and Discharge Destination in the Context of an Assess and Restore Program in Hospitalized Older Adults. *Geriatrics (Basel).* 2022;7(3). doi: 10.3390/geriatrics7030050.

Eliassen M, Henriksen NO, Moe S. Physiotherapy supervision of home trainers in interprofessional reablement teams. *J Interprof Care*. 2019;33(5):512-8. doi:10.1080/13561820.2018.1541877.

Eliassen M, Henriksen N, Moe S. The practice of support personnel, supervised by physiotherapists, in Norwegian reablement services. *Physiother Res Int.* 2019;24(1): e1754. doi:10.1002/pri.1754

Eliassen M, Lahelle A. Enhancing functional improvement in reablement-a qualitative study. *European Journal of Physiotherapy*. 2021;23(6):355-61. doi: 10.1080/21679169.2020.1761449

Eliassen M, Moholt JM. Boundary work in task-shifting practices - a qualitative study of reablement teams. *Physiother Theory Pract.* 2022((Eliassen) Department of Health and Care sciences, UiT, Arctic University of Norway, Norway):1-14.

Eliassen M, Henriksen NO, Moe S. Variations in physiotherapy practices across reablement settings. *Physiother Theory Pract*. 2020;36(1):108-21. doi:10.1080/09593985.2018.1481162.

Faria R. Economic Evaluation of Social Care Interventions: Lessons Drawn from a Systematic Review of the Methods Used to Evaluate Reablement. *HEOR*: Open Access. 2016;2(1). doi: 10.4172/2471-268X/1000107

Fersch B. Expectations towards home care re-ablement in Danish municipalities. *Int J Soc Pol*. 2015;35(3/4):126-140.doi:10.1108/IJSSP-06-2014-0045

Flemming J, Armijo-Olivo S, Dennett L, et al. Enhanced Home Care Interventions for Community Residing Adults Compared with Usual Care on Health and Cost-effectiveness Outcomes: *Am J Phys Med Rehabil*. 2021;100(9):906-17. doi:10.1097/PHM.0000000000001734.

Galik EM, Resnick B. Restorative care with cognitively impaired older adults: Moving beyond behavior. *Topic Geriatr Rehabil*. 2007;23(2):114-25.doi: 10.1097/01.TGR.0000270180.06027.34

Galik EM, Resnick B, Gruber-Baldini A, Nahm ES, Pearson K, Pretzer-Aboff I. Pilot Testing of the Restorative Care Intervention for the Cognitively Impaired. *J Am Med Dir Assoc.* 2008;9(7):516-522. doi:10.1016/j.jamda.2008.04.013.

Galik EM, Resnick B, Pretzer-Aboff I. 'Knowing what makes them tick': motivating cognitively impaired older adults to participate in restorative care. *Int J Nurs Pract.* 2009;15(1):48-55. doi:10.1111/j.1440-172X.2008.01721.x.

Gerrish K, Laker S, Wright S, Stainrod W. Medicines reablement in intermediate health and social care services. *Prim Health Care Res Dev.* 2017;18(4):305-15. doi:10.1017/S1463423617000238.

Glendinning C, Newbronner E. The effectiveness of home care reablement -- developing the evidence base. *J Integr Care*. 2008;16(4):32-9.doi:10.1108/14769018200800031

Golenko X, Paine K, Meyer C. Evaluation of a wellness and reablement approach in Australia: Learnings from a pilot project. *Health Soc Care Community*. 2021;30(3):e770-e780. doi: 10.1111/hsc.13447. Epub 2021 May 26. PMID: 34041802.

Gruber-Baldini AL, Resnick B, Hebel JR, Galik E, Zimmerman S. Adverse Events Associated with the Res-Care Intervention. *J Am Med Dir Assoc.* 2011;12(8):584-9. doi:10.1016/j.jamda.2010.05.011.

Gustafsson LK, Anbäcken EM, Elfström M, Zander V, Östlund G. Working with short-term goal-directed reablement with older adults: Strengthened by a collaborative approach. *Nord J Nurs Res*. 2019;39(4):178-85.doi:10.1177/2057158519850

Gustafsson L-K, Ostlund G, Zander V, Elfstrom ML, Anbacken E-M. 'Best fit' caring skills of an interprofessional team in short-term goal-directed reablement: older adults' perceptions. *Scand J Caring Sci.* 2019;33(2):498-506. doi:10.1111/scs.12650.

Hattori S, Yoshida T, Okumura Y, Kondo K. Effects of reablement on the independence of community-dwelling older adults with mild disability: A randomized controlled trial.  *Int J Environ Res Public Health*. 2019;16(20):3954. doi:10.3390/ijerph16203954.

Henskens M, Nauta IM, Scherder EJA, Oosterveld FGJ, Vrijkotte S. Implementation and effects of Movement-oriented Restorative Care in a nursing home - a quasi-experimental study. *BMC Geriatr*. 2017;17(1):243. doi:10.1186/s12877-017-0642-x.

Hjelle KM, Skutle O, Alvsvåg H, Førland O. Reablement teams' roles: A qualitative study of interdisciplinary teams' experiences. *J Multidiscip Healthc*. 2018; 11:305-16. doi:10.2147/JMDH.S160480.

Hjelle KM, Skutle O, Førland O, Alvsvåg H. The reablement team's voice: A qualitative study of how an integrated multidisciplinary team experiences participation in reablement. *J Multidiscip Healthc*. 2016;9:575-85. doi: 10.2147/JMDH.S115588.

Hjelle KM, Tuntland H, Førland O, Alvsvåg H. Driving forces for home-based reablement; a qualitative study of older adults' experiences. *Health Soc Care Community.* 2017;25(5):1581-9.

Hjelle KM, Alvsvåg H, Førland O. The relatives' voice: how do relatives experience participation in reablement? A qualitative study. *J Multidiscip Healthc*. 2016; 10:1-11. doi:10.1111/hsc.12324.

Hu F-W, Huang Y-T, Lin H-S, Chen C-H, Chen M-J, Chang C-M. Effectiveness of a simplified reablement program to minimize functional decline in hospitalized older patients. *Geriatr Gerontol Int.* 2020;20(5):436-42. doi:10.1111/ggi.13891.

Ingstad K, Moe A, Brataas HV. Patient involvement during a pathway of home-based reablement for older persons: A longitudinal single-case study. *J Multidiscip Healthc*. 2021; 14:1911-1921. doi:10.2147/JMDH.S321760.

Jacobi CJ, Thiel D, Allum N. Enabling and constraining successful reablement: Individual and neighbourhood factors. *PLoS ONE*. 2020;15(9 September): e0237432.

Jakobsen FA, Vik K. Health professionals' perspectives of next of kin in the context of reablement. *Disabil Rehabil.* 2019;41(16):1882-9. doi: 10.1080/09638288.2018.1450452.

Jakobsen FA, Vik K, Ytterhus B. The art of maintaining everyday life: Collaboration among older parents, their adult children, and health care professionals in reablement. *J Multidiscip Healthc*. 2019; 12:269-80. doi:10.2147/JMDH.S195833.

Jeon Y-H, Clemson L, Naismith SL, et al. Improving the social health of community-dwelling older people living with dementia through a reablement program. *Int Psychogeriatr*. 2018;30(6):915-1920. doi:10.1017/S1041610217001533.

Jeon Y-H, Krein L, Simpson JM, et al. Feasibility and potential effects of interdisciplinary home-based reablement program (I-HARP) for people with cognitive and functional decline: a pilot trial. *Aging Ment Health*. 2020;24(11):1916-1925. doi:10.1080/13607863.2019.1642298.

Jeon Y-H, Simpson JM, Low L-F, et al. A pragmatic randomised controlled trial (RCT) and realist evaluation of the interdisciplinary home-bAsed Reablement program (I-HARP) for improving functional independence of community dwelling older people with dementia: an effectiveness-implementation hybrid design. *BMC Geriatr*. 2019;19(1). doi: 10.1186/s12877-019-1216-x.

Jokstad K, Hauge S, Landmark BT, Skovdahl K. Control as a Core Component of User Involvement in Reablement: A Qualitative Study. *J Multidiscip Healthc*. 2020; 13:1079-88. doi:10.2147/JMDH.S269200.

Jokstad K, Landmark BT, Hauge S, Skovdahl K-I. Elderly people's experiences of everyday rehabilitation - Coping and opportunities - requirements and support in a dynamic interplay. *Tidsskrift for Omsorgsforskning*. 2016;2(3):212-21.

Jokstad K, Landmark BT, Skovdahl K. Person-centred research practice: the user involvement in research of older adults with first-hand experience of reablement. *Ageing Soc*. 2022;42(2):143-56. doi:10.1017/S0144686X20000781

Jokstad K, Skovdahl K, Landmark BT, Haukelien H. Ideal and reality; Community healthcare professionals' experiences of user-involvement in reablement. *Health Soc Care Community.* 2019;27(4):907-16. doi:10.1111/hsc.12708.

Jung D, Byun J, Lee M, Kim H. Psychometric testing of Korean versions of self-efficacy and outcome expectations for restorative care activities scales. *Geriatr Nurs*. 2017;38(3):207-12. doi: 10.1016/j.gerinurse.2016.10.012.

Jørmeland C, Vik K. Ergo- og fysioterapeuters erfaringer med hverdasgrehabilitering. Ergoterapeuten *(The Norwegian Journal of Occupational Therapy)*. 2019; 1:36-45.

King AI, Parsons M, Robinson E. A restorative home care intervention in New Zealand: perceptions of paid caregivers. *Health Soc Care Community.* 2012;20(1):70-9. doi:10.1111/j.1365-2524.2011.01020.x.

King A, Parsons M, Robinson E, Jorgensen D. Assessing the impact of a restorative home care service in New Zealand: A cluster randomised controlled trial. *Health Soc Care Community*. 2012;20(4):365-74. doi:10.1111/j.1365-2524.2011.01039.x.

Kirchhoff R, Berg H. Use of video communication technology in everyday life and/or telecommunications rehabilitation. *Sykepleien Forskning.* 2016;11(2):174-83. doi: 10.4220/Sykepleienf.2016.57820en

Kjerstad E, Tuntland HK. Reablement in community-dwelling older adults: a cost-effectiveness analysis alongside a randomized controlled trial. *Health Econ Rev.* 2015;6(1):15. doi:10.1186/s13561-016-0092-8.

Langeland E, Tuntland H, Førland O, et al. Study protocol for a multicenter investigation of reablement in Norway. *BMC Geriatr.* 2015;15:111.doi: 10.1186/s12877-015-0108-y

Langeland E, Tuntland H, Folkestad B, Forland O, Jacobsen FF, Kjeken I. A multicenter investigation of reablement in Norway: a clinical controlled trial. *BMC Geriatr.* 2019;19(1):29. doi:10.1186/s12877-019-1038-x.

Lanne M, Leikas J. Ethical AI in the re-ablement of older people: Opportunities and challenges. *Gerontechnology*. 2021;20(2):1-13. doi:10.4017/gt.2021.20.2.26-473.11

Le Mesurier N, Cumella S. Enhancing independence: the effectiveness of re-ablement provision in South Worcestershire. *Managing Community Care*. 1999;7(4):27-32. doi: 10.1108/14769018199900025

Lee W-J, Peng L-N, Cheng Y-Y, Liu C-Y, Chen L-K, Yu H-C. Effectiveness of short-term interdisciplinary intervention on postacute patients in Taiwan.  *J Am Med Dir Assoc*. 2011;12(1):29-32. doi:10.1016/j.jamda.2010.01.002.

Legg L, Gladman J, Drummond A, Davidson A. A systematic review of the evidence on home care reablement services. *Clin Rehabil*. 2016;30(8):741-9. doi:10.2147/CIA.S49164.

Lewin GF, Alfonso HS, Alan JJ. Evidence for the long term cost effectiveness of home care reablement programs. *Clin Interv Aging*. 2013; 8:1273-81. doi:10.2147/CIA.S49164.

Lewin G, Allan J, Patterson C, Knuiman M, Boldy D, Hendrie D. A comparison of the home-care and healthcare service use and costs of older Australians randomised to receive a restorative or a conventional home-care service. *Health Soc Care Community*. 2014;22(3):328-36. doi:10.1111/hsc.12092.

Lewin G, Concanen K, Youens D. The home independence program with non-health professionals as care managers: An evaluation. *Clin Interv Aging*. 2016;11:807-17. doi:10.2147/CIA.S106180.

Lewin G, De San Miguel K, Knuiman M, Alan J, Boldy D, Hendrie D, et al. A randomised controlled trial of the Home Independence Program, an Australian restorative home-care programme for older adults. *Health Soc Care Community.* 2013;21(1):69-78. doi:10.1111/j.1365-2524.2012.01088.x.

Lewis LK, Henwood T, Boylan J, Hunter S, Lange B, Lawless M, et al. Re-thinking reablement strategies for older adults in residential aged care: a scoping review. *BMC Geriatr*. 2021;21(1):667. doi:10.1186/s12877-021-02627-7.

Liaaen J, Vik K. Becoming an enabler of everyday activity: Health professionals in home care services experiences of working with reablement. *Int J Older People Nurs.* 2019;14(4): e12270.

Lillefjell M, Anthun KS. Reablement in a small municipality, a survival analysis. *BMC Health Serv Res*. 2021;21(1):877. doi:10.1186/s12913-021-06910-6

Lotvonen S, Saarela K-M, Tuomikoski A-M, KyngÄS H, Siira H. Kotihoidossa ikääntyneille toteutetut kuntoutumista edistävän hoitotyön toimintamallit: kartoittava katsaus. *Hoitotiede*. 2021;33(2):86-101. https://journal.fi/hoitotiede/article/view/128961/77998

Low L-F, Fletcher J. Models of home care services for persons with dementia: a narrative review. *Int Psychogeriatr*. 2015;27(10):1593-600.  doi:10.1017/S1041610215000137.

Low L-F, Venkatesh S, Clemson L, Merom D, Casey A-N, Brodaty H. Feasibility of LifeFul, a relationship and reablement-focused culture change program in residential aged care. *BMC Geriatr.* 2018;18(1):1-12. doi:10.1186/s12877-018-0822-3.

Magne TA, Vik K. Promoting Participation in Daily Activities through Reablement: A Qualitative Study. *Rehabil Res Pract*. 2020:6506025.

Mann R, Beresford B, Parker G, Rabiee P, Weatherly H, Faria R, et al. Models of reablement evaluation (MoRE): a study protocol of a quasi-experimental mixed methods evaluation of reablement services in England. *BMC Health Serv Res*. 2016;16(a):375.

Maxwell H, Bramble M, Prior SJ, Heath A, Reeves NS, Marlow A, et al. Staff experiences of a reablement approach to care for older people in a regional Australian community: A qualitative study. *Health Soc Care Community.* 2021;29(3):685-93. doi:10.1111/hsc.13331.

Mayhew E, Beresford B, Laver-Fawcett A, et al. The Hopkins Rehabilitation Engagement Rating Scale - Reablement Version (HRERS-RV): Development and psychometric properties. *Health Soc Care Community.* 2019;27(3):777-87. doi:10.1111/hsc.12696.

Meisingset I, Bjerke J, Taraldsen K, et al. Patient characteristics and outcome in three different working models of home-based rehabilitation: a longitudinal observational study in primary health care in Norway. *BMC Health Serv Res*. 2021;21(1):887. doi:10.1186/s12913-021-06914-2.

Metzelthin SF, Rooijackers TH, Zijlstra GAR, et al. Effects, costs and feasibility of the 'Stay Active at Home' Reablement training programme for home care professionals: study protocol of a cluster randomised controlled trial. *BMC Geriatr.* 2018;18(1):276. doi:10.1186/s12877-018-0968-z.

Metzelthin SF, Rostgaard T, Parsons M, Burton E. Development of an internationally accepted definition of reablement: a Delphi study. *Ageing Soc*. 2022;42(3):703-18.doi: 10.1017/S0144686X20000999

O’Brien, K., Welsch, D., Barnable, A., Wiseman, G., Colbourne, A. The Impact of Introducing Restorative Care on Client Outcomes and Health System Effectiveness in an Integrated Health Authority. *Home Health Care Manage Pract*. 2017;29(1):13-45.

Mjøsund HL, Burton E, Moe CF, Uhrenfeldt L. Integration of physicalactivity in reablement for community-dwelling older adults: A scoping review protocol. *JBI Database System Rev Implement Rep*. 2019;17(9):1924-32. doi:10.11124/JBISRIR-2017-003938.

Mjøsund HL, Moe CF, Burton E, Uhrenfeldt L. Integration of physical activity in reablement for community dwelling older adults: A systematic scoping review. *J Multidiscip Healthc.* 2020; 13:1291-315. doi:10.2147/JMDH.S270247.

Mjøsund HL, Moe CF, Burton E, Uhrenfeldt L. Promotion of physical activity through reablement for older adults: Exploring healthcare professionals' clinical reasoning. *J Multidiscip Healthc*. 2021; 14:1623-35. doi: 10.2147/JMDH.S315553.

Mjøsund HL, Uhrenfeldt L, Burton E, Moe CF. Promotion of physical activity in older adults: facilitators and barriers experienced by healthcare personnel in the context of reablement. *BMC Health Serv Res*. 2022;22(1):956. doi:10.1186/s12913-022-08247-0.

Moe A, Ingstad K, Brataas HV. Patient influence in home-based reablement for older persons: qualitative research. *BMC Health Serv Res.* 2017;17(1):736. doi:10.1186/s12913-017-2715-0.

Moe C, Brinchmann BS. Optimising Capacity - A service User and Caregiver Perspective on Reablement. *Grounded Theory Review*. 2016;15(2):25-39.

Moe C, Brinchmann BS. Tailoring reablement: A grounded theory study of establishing reablement in a community setting in Norway. *Health Soc Care Community*. 2018;26(1):113-21. doi:10.1111/hsc.12471

Moe CF, Gårseth-Nesbakk L, Brinchmann BS. Facilitators and barriers for the inter-professional collaboration of reablement. *Tidsskrift for Omsorgsforskning*. 2019;5(1):1-16.

Mulquiny L, Oakman J. Exploring the experience of reablement: A systematic review and qualitative evidence synthesis of older people's and carers' views. *Health Soc Care Community.* 2022;30(5):e1471-e1483. doi:10.1111/hsc.13837.

Newton C. Personalising reablement: inserting the missing link. Working with Older People: *Community Care Policy & Practice.* 2012;16(3):117-21. doi:10.1108/13663661211260934

O'Connor CMC, Gresham M, Poulos RG, et al. Understanding in the Australian aged care sector of reablement interventions for people living with dementia: a qualitative content analysis. *BMC Health Serv Res*. 2020;20(1):140. doi:10.1186/s12913-020-4977-1.

O'Connor CMC, Gresham M, Poulos RG, et al. Translating reablement research for dementia practice: development of a handbook using implementation science. *Disabil Rehabil*. 2020:1-13. doi:10.1080/09638288.2020.1797910.

O'Connor CMC, Rowlands A, Poulos CJ. Development of an assessment guide to evaluate meaningful outcomes for people living with dementia who are engaged in reablement programs. *Disabil Rehabil*. 2021:1-13. doi:10.1080/09638288.2021.1960437.

Östlund G, Zander V, Elfström ML, Gustavsson L-K, Anbäcken E-M. Older adults' experiences of a reablement process. "To be treated like an adult, and ask for what I want and how I want it". *Educl Gerontol.* 2019;45(8):519-29. doi:10.1080/03601277.2019.1666525.

Parsons JG, Parsons MJ. The effect of a designated tool on person-centred goal identification and service planning among older people receiving homecare in New Zealand. *Health Soc Care Community*. 2012;20(6):653-62. doi:10.1111/j.1365-2524.2012.01081.x.

Parsons JG, Sheridan N, Rouse P, Robinson E, Connolly M. A randomized controlled trial to determine the effect of a model of restorative home care on physical function and social support among older people. *Arch Phys Med Rehabil*. 2013;94(6):1015-22. doi: 10.1016/j.apmr.2013.02.003.

Parsons J, Rouse P, Robinson EM, Sheridan N, Connolly MJ. Goal setting as a feature of homecare services for older People: does it makes a difference? *Age Ageing*. 2012; 41:24-9. doi:10.1093/ageing/afr118.

Parsons M, Senior H, Kerse N, Chen MH, Jacobs S, Anderson C. Randomised trial of restorative home care for frail older people in New Zealand. *Nurs Older People*. 2017;29(7):27-33. doi:10.7748/nop.2017.e897.

Pettersson C, Zingmark M, Haak M. Enabling social participation for older people: The content of reablement by age, gender, and level of functioning in occupational therapists' interventions. *Scand J Occup Ther*. 2021:1-8. doi:10.1080/11038128.2021.1967442.

Pettersson C, Iwarsson S. Evidence-based interventions involving occupational therapists are needed in re-ablement for older community-living people: A systematic review. *Brit J Occup Ther*. 2017;80(5):273-85.

Poulos CJ, Bayer A, Beaupre L, et al. A comprehensive approach to reablement in dementia. *Alzheimers Dement (N Y).* 2017;3(3):450-8. doi: 10.1016/j.trci.2017.06.005.

Poulos CJ, Poulos RG. A function-focused approach in primary care for older people with functional decline: Making the most of reablement and restorative care. *Aust J Gen Pract.* 2019;48(7):434-9. doi:10.31128/AJGP-01-19-4808.

Prior SJ, Heath A, Reeves NS, et al. Determining readiness for a reablement approach to care in Australia: Development of a pre-employment questionnaire. *Health Soc Care Community.* 2022;30(2):498-508. doi:10.1111/hsc.13150.

Prokofyeva E, Krohne K. Helsefagarbeideres erfaringer med hverdagsrehabilitering. *Tidsskrift for Omsorgsforskning*. 2020;6(3):1-11.https://hdl.handle.net/11250/2727140

Rabiee P, Glendinning C. Organisation and delivery of home care re-ablement: What makes a difference?. *Health Soc Care Community*. 2011;19(5):495-503. doi:10.1111/j.1365-2524.2011.01010.x.

Rahja M, Culph J, Clemson L, Day S, Laver K. A second chance: Experiences and outcomes of people with dementia and their families participating in a dementia reablement program. *Brain Impair*. 2020;21(3):274-85. doi:10.1017/BrImp.2019.34

Rahja M, Nguyen K-H, Laver K, Clemson L, Crotty M, Comans T. Implementing an evidence-based dementia care program in the Australian health context: A cost-benefit analysis. *Health Soc Care Community*. 2020;28(6):2013-24. doi:10.1111/hsc.13013.

Ranner M, Vik K. Discourses of service recipients in the context of reablement in Norway. *Scand J Occup Ther*. 2021;28(3):201-12. doi:10.1080/11038128.2020.1795246.

Resnick B, Cayo J, Galik E, Pretzer-Aboff I. Implementation of the 6-week educational component in the Res-Care intervention: process and outcomes. *J Contin Educ Nurs.* 2009;40(8):353-60. doi:10.3928/00220124-20090723-04.

Resnick B, Fleishell A. Developing a restorative care program. *Am J Nurs.* 2002;102(7):91-95. doi:10.1097/00000446-200207000-00046.

Resnick B, Galik E, Boltz M. Function Focused Care Approaches: Literature Review of Progress and Future Possibilities. *J Am Med Dir Assoc.* 2013;14(5):313-8. doi: 10.1016/j.jamda.2012.10.019.

Resnick B, Galik E, Gruber-Baldini AL, Zimmerman S. Implementing a restorative care philosophy of care in assisted living: pilot testing of Res-Care-AL. Restorative Care for Assisted Living. *J Am Acad Nurse Pract.* 2009;21(2):123-33.  doi:10.1111/j.1745-7599.2008.00394.x.

Resnick B, Galik E, Pretzer-Aboff I, et al. Treatment fidelity in nursing home research: the Res-Care Intervention Study. *Res Gerontol Nurs.* 2009;2(1):30-8. doi:10.3928/19404921-20090101-09.

Resnick B, Galik E, Pretzer-Aboff I, Rogers V, Gruber-Baldini AL. Testing the reliability and validity of self-efficacy and outcome expectations of restorative care performed by nursing assistants. *J Nurs Care Qual.* 2008;23(2):162-9. doi: 10.1097/01.NCQ.0000313766.09891.43.

Resnick B, Gruber-Baldini AL, Galik E, et al. Changing the philosophy of care in long-term care: Testing of the restorative care intervention. *Gerontologist.* 2009;49(2):175-84. doi:10.1093/geront/gnp026.

Resnick B, Gruber-Baldini AL, Zimmerman S, et al. Nursing home resident outcomes from the res-care intervention. *J Am Geriatr Soc*. 2009;57(7):1156-65. doi:10.1111/j.1532-5415.2009.02327.x.

Resnick B, Petzer-Aboff I, Galik E, et al. Barriers and Benefits to Implementing a Restorative Care Intervention in Nursing Homes. *J Am Med Dir Assoc.* 2008;9(2):102-8. doi: 10.1016/j.jamda.2007.08.011.

Resnick B, Rogers V, Galik E, Gruber-Baldini AL. Measuring restorative care provided by nursing assistants: Reliability and validity of the restorative care behavior checklist. *Nurs Res.* 2007;56(6):387-98. doi: 10.1097/01.NNR.0000299854.52429.ac.

Resnick B, Simpson M. Restorative care nursing activities: Pilot testing self-efficacy and outcome expectation measures. *Geriatr Nurs*. 2003;24(2):82-9. doi:10.1067/mgn.2003.26.

Resnick B, Simpson M, Bercovitz A, et al. Testing of the Res-Care Pilot Intervention: Impact on nursing assistants. *Geriatr Nurs.* 2004;25(5):292-7. doi: 10.1016/j.gerinurse.2004.08.002.

Resnick B, Simpson M, Bercovitz A, et al. Pilot testing of the Restorative Care Intervention: impact on residents. *J Gerontol Nurs.* 2006;32(3):39-47. doi:10.3928/00989134-20060301-07.

Resnick B, Simpson M, Galik E, et al. Making a difference: nursing assistants' perspectives of restorative care nursing. *Rehabil Nurs.* 2006;31(2):78-86. doi:10.1002/j.2048-7940.2006.tb00131.x.

Rooijackers TH, Kempen GIJM, Zijlstra GAR, et al. Effectiveness of a reablement training program for homecare staff on older adults' sedentary behavior: A cluster randomized controlled trial. *J Am Geriatr Soc.* 2021;69(9):2566-78. doi:10.1111/jgs.17286.

Rooijackers TH, Metzelthin SF, van Rossum E, et al. Economic Evaluation of a Reablement Training Program for Homecare Staff Targeting Sedentary Behavior in Community-Dwelling Older Adults Compared to Usual Care: A Cluster Randomized Controlled Trial. *Clin Interv Aging*. 2021; 16:2095-109. doi:10.2147/CIA.S341221.

Rooijackers TH, Zijlstra GAR, van Rossum E, et al. Process evaluation of a reablement training program for homecare staff to encourage independence in community-dwelling older adults. *BMC geriatrics.* 2021;21(1):5.

Rooijackers T, van Rossum E, Zijlstra GAR, Kempen GIJM, Passos VL, Metzelthin SF. Effectiveness of a reablement training program on self-efficacy and outcome expectations regarding client activation in homecare staff: A cluster randomized controlled trial. *Geriatr Nurs.* 2022;43:104-12. doi: 10.1016/j.gerinurse.2021.11.009.

Rostad HM, Skinner MS, Helleso R, Sogstad MKR. Towards specialised and differentiated long-term care services: a cross-sectional study. *BMC Health Serv Res*. 2020;20(1):793. doi:10.1186/s12913-020-05647-y.

Runacres F, Gregory H, Ugalde A. Restorative care for palliative patients: a retrospective clinical audit of outcomes for patients admitted to an inpatient palliative care unit. *BMJ Support Palliat Care.* 2016;6(1):97-100. doi:10.1136/bmjspcare-2014-000774.

Ryburn B, Wells Y, Foreman P. Enabling independence: restorative approaches to home care provision for frail older adults. *Health Soc Care Community*. 2009;17(3):225-34. doi:10.1111/j.1365-2524.2008.00809.x.

Sabol VK, Resnick B, Galik E, Gruber-Baldini AL, Morton PG, Hicks GE. Exploring the factors that influence functional performance among nursing home residents. *J Aging Health.* 2011;23(1):112-34. doi:10.1177/0898264310383157.

Sandvoll AM, Ruud T, Sæterbakken AH. Samhandling om kvardagsrehabilitering–ein kvalitativ studie. *Tidsskrift for Omsorgsforskning*. 2020;6(01):1-14.doi: 10.18261/issn.2387-5984-2020-01-10

Schneider J, Hahn J, Tatzer VC. Reablement - ein Zukunftskonzept auch in der deutschsprachigen Ergotherapie? *Ergoscience*. 2019;14(4):166-7.

Seberg M, Eriksson BG. Reablement in Mental Health Care and the Role of the Occupational Therapist: A Qualitative Study. *SAGE Open*. 2018;8(2):2158244018784644.

Senior HE, Parsons M, Kerse N, et al. Promoting independence in frail older people: a randomized controlled trial of a restorative care service in New Zealand. *Age Ageing*. 2014;43(3):418-24. doi:10.1093/ageing/afu025.

Sims-Gould J, Tong CE, Wallis-Mayer L, Ashe MC. Reablement, Reactivation, Rehabilitation and Restorative Interventions with Older Adults in Receipt of Home Care: A Systematic Review. *J Am Med Dir Assoc*. 2017;18(8):653-63. doi: 10.1016/j.jamda.2016.12.070.

Shanti C, Johnson J, Myers AM, et al. Evaluation of the restorative care education and training program for nursing homes. *Can J Aging*. 2005;24(2):115-126. doi: 10.1353/cja.2005.

Slasberg C. Re-ablement, efficiency and outcomes working. *J Care Serv Manage*. 2010;4(2):141-9.doi:10.1179/175016810X12670238441986

Slater P, Hasson F. An evaluation of the reablement service programme on physical ability, care needs and care plan packages. *J Integr Care.* 2018;26(2):140-9.doi: 10.1108/JICA-11-2017-0042

Smeets RGM, Kempen GIJM, Zijlstra GAR, et al. Experiences of home‐care workers with the 'Stay Active at Home' programme targeting reablement of community‐living older adults: An exploratory study. *Health Soc Care Community*. 2020;28(1):291-9. doi:10.1111/hsc.12863.

Song C-Y, Lin P-S, Hung P-L, Clinic ADOT. Effects of Community-Based Physical-Cognitive Training, Health Education, and Reablement among Rural Community-Dwelling Older Adults with Mobility Deficits. *Int J Environ Res Public Health.* 2021;18(17). doi:10.3390/ijerph18179374.

Stausholm MN, Pape-Haugaard L, Hejlesen OK, Secher PH. Reablement professionals' perspectives on client characteristics and factors associated with successful home-based reablement: a qualitative study. *BMC Health Serv Res.* 2021;21(1):665. doi:10.1186/s12913-021-06625-8.

Talley KM, Wyman JF, Savik K, Kane RL, Mueller C, Zhao H. Restorative Care's Effect on Activities of Daily Living Dependency in Long-stay Nursing Home Residents. *Gerontologist.* 2015;55(Suppl 1): S88-S98. doi:10.1093/geront/gnv011.

Tessier A, Beaulieu M-D, McGinn CA, Latulippe R. Effectiveness of Reablement: A Systematic Review. Efficacite de l'autonomisation: une revue systematique. *Healthc Policy.* 2016;11(4):49-59. PMC4872552.

Tew J, Nicholls V, Plumridge G, Clarke H. Family-Inclusive Approaches to Reablement in Mental Health: Models, Mechanisms and Outcomes. *Brit J Soc Work*. 2017;47(3):864-84. doi:10.1093/bjsw/bcw106

Thuesen J, Feiring M, Doh D, Westendorp RGJ. Reablement in need of theories of ageing: would theories of successful ageing do? *Ageing Soc.* 2021:1-13.

Tinetti ME, Baker D, Gallo WT, Nanda A, Charpentier P, O'Leary J. Evaluation of restorative care vs usual care for older adults receiving an acute episode of home care. *JAMA*. 2002;287(16):2098-105. doi:10.1001/jama.287.16.2098.

Tinetti ME, Charpentier P, Gottschalk M, Baker DI. Effect of a restorative model of posthospital home care on hospital readmissions. *J Am Geriatr Soc.* 2012;60(8):1521-6. doi:10.1111/j.1532-5415.2012.04060.x.

Trappes-Lomax T, Hawton A. The user voice: older people's experiences of reablement and rehabilitation. *J Integr Care.* 2012;20(3):181-94.doi: 10.1108/14769011211237528

Tuntland H, Aaslund MK, Espehaug B, Førland O, Kjeken I. Reablement in community-dwelling older adults: a randomised controlled trial. BMC Geriatr. 2015; 15(145):1-11. doi:10.1186/s12877-015-0142-9.

Tuntland H, Aaslund MK, Langeland E, Espehaug B, Kjeken I. Psychometric properties of the Canadian occupational performance measure in home-dwelling older adults. *J Multidiscip Healthc.* 2016; 9:411-23.doi:10.2147/jmdh.s113727

Tuntland H, Espehaug B, Forland O, Hole AD, Kjerstad E, Kjeken I. Reablement in community-dwelling adults: study protocol for a randomised controlled trial. *BMC Geriatr.* 2014; 14:139. doi:10.1186/1471-2318-14-139.

Tuntland H, Kjeken I, Folkestad B, Førland O, Langeland E. Everyday occupations prioritised by older adults participating in reablement. A cross-sectional study. *Scand J Occup Ther.* 2020;27(4):248-58.

Tuntland H, Kjeken I, Langeland E, Folkestad B, Espehaug B, Førland O, et al. Predictors of outcomes following reablement in community-dwelling older adults. *Clin Interv Aging.* 2016; 12:55-63. doi:10.2147/CIA.S125762.

Walker BL, Harrington SS. Results of a field test and follow-up study of a restorative care training program.  *Nurse Educ Today.* 2013;33(9):1034-9. doi: 10.1016/j.nedt.2012.05.007.

Walker BL, Harrington SS. The effects of restorative care training on caregiver job satisfaction. *J Nurses Prof Dev.* 2013;29(2):73-8. doi:10.1097/NND.0b013e318286c2e0.

Walker BL, Harrington SS, Cole CS. Teaching Philosophy and Methods of Restorative Care to Assisted Living Owners and Staff. *Educ Gerontol.* 2013;39(1):28-36.doi: 10.1080/03601277.2012.660864

Wang Y-H, Liu L-F, Chang L-H, Yeh C-H. The Implementation of Restorative Care and Factors Associated with Resident Outcomes in Long-Term Care Facilities in Taiwan. *Int J Environ Res Public Health*. 2019;16(20). doi:10.3390/ijerph16203860.

Wess T, Steiner W, Dur M, Janssen J. Reablement - relevant factors for implementation: an exploratory sequential mixed-methods study design. *BMC Health Serv Res.* 2022;22(1):959.doi: 10.1186/s12913-022-08355-x

Whitehead PJ, Worthington EJ, Parry RH, Walker MF, Drummond AE. Interventions to reduce dependency in personal activities of daily living in community dwelling adults who use homecare services: a systematic review. *Clin Rehabil*. 2015;29(11):1064-76.doi: 10.1177/0269215514564894

Whitehead P, Drummond AER, Parry RH, Latif Z, McGeorge ID, Walker MF. Occupational therapy in homecare re-ablement services (others): Results of a feasibility randomized controlled trial. *Clin Rehabil*. 2017;31(3):421.doi: 10.1177/0269215516678652

Whitehead PJ, Drummond AEE, Walker MF, Parry RH. Interventions to reduce dependency in personal activities of daily living in community-dwelling adults who use homecare services: protocol for a systematic review. *Syst Rev.* 2013; 2:49.doi: 10.1186/2046-4053-2-49

Whitehead PJ, Drummond AER, Parry RH, Walker MF. Content and acceptability of an Occupational Therapy intervention in HomEcare Re-ablement Services (OTHERS). *Brit J Occup Ther*. 2018;81(9):535-42.

Whitehead PJ, Drummond AE, Walker MF, Parry, R.H., McGeorge, I.D., Latif. Z. Occupational Therapy in HomEcare Re-ablement Services (OTHERS): study protocol for a randomized controlled trial. *Trials.* 2014;15(1):447. doi:10.1186/1745-6215-15-447.

Wilde A, Glendinning C. 'If they're helping me then how can I be independent?' The perceptions and experience of users of home-care re-ablement services. *Health Soc Care Community.* 2012;20(6):583-90. doi:10.1111/j.1365-2524.2012.01072.x.

Winkel A, Langberg H, Waehrens EE. Reablement in a community setting. *Disabil Rehabil.* 2015;37(15):1347-52. doi:10.3109/09638288.2014.963707.

Yu HW, Wu SC, Chen HH, Yeh YP, Chen YM. Relationships between reablement-embedded home- and community-based service use patterns and functional improvement among older adults in Taiwan. *Health Soc Care Community*. 2022;30(6),4321–4331. doi:10.1111/hsc.13825.

Yu HW, Chiu TY, Chen PY, Liao TH, Chang WH, Wang MW, et al. Developing an assessment scale for long-term care reablement literacy in home care workers in Taiwan using a modified Delphi method. *BMC Geriatr.* 2020;20(448):1-9. doi:10.1186/s12877-020-01854-8.

Zingmark M, Evertsson B, Haak M. Characteristics of occupational therapy and physiotherapy within the context of reablement in Swedish municipalities: A national survey. *Health Soc Care Community*. 2020;28(3):1010-1019. doi:10.1111/hsc.12934.

Zingmark M, Kylen M. Feasibility of a reablement-program in a Swedish municipality. *Scand J Occup Ther.* 2022;30(1):1-12. doi:10.1080/11038128.2022.2089229.

Zingmark M, Evertsson B, Haak M. The content of reablement: Exploring occupational and physiotherapy interventions. *Brit J Occup Ther.* 2019;82(2):122-6.doi: 10.1177/0308022618792188
